# Supplementary material for: Sulfonium Ligands of the α7 nAChR
Source: MDPI journal article supplement (doi:10.3390/molecules26185643), 2021-09-17
Supplement: s1 [file s1]

**Table S1.** Statistical analysis for data of Figure 3. One Way ANOVA      Figure 3A  
Factor A: 11 Groups  
S1, S2, S3, S4, S5, S6, S7, S8, S9, S10, S11

Analysis of Variance Results

| Source | DF | SS        | MS        | F         | P        |
|--------|----|-----------|-----------|-----------|----------|
| Total  | 85 | 186788.76 | 2197.5148 |           |          |
| A      | 10 | 114990.43 | 11499.043 | 12.011814 | < 0.0001 |
| Error  | 75 | 71798.333 | 957.31111 |           |          |

Bonferroni's All Pairs Comparison

| Comparison | Mean Difference | t      | P        | 95% CL             |
|------------|-----------------|--------|----------|--------------------|
| S1 vs S2   | 4.07286         | 0.2543 | 1        | -51.252 to 59.397  |
| S1 vs S3   | 13.6674         | 0.8264 | 1        | -43.472 to 70.806  |
| S1 vs S4   | 53.3732         | 3.3331 | 0.0735   | -1.9514 to 108.7   |
| S1 vs S5   | 53.2813         | 3.3273 | 0.0748   | -2.0433 to 108.61  |
| S1 vs S6   | -50.7983        | 3.1723 | 0.1206   | -106.12 to 4.5263  |
| S1 vs S7   | 32.0249         | 1.9999 | 1        | -23.3 to 87.35     |
| S1 vs S8   | 53.4841         | 3.34   | 0.0719   | -1.8406 to 108.81  |
| S1 vs S9   | -53.1547        | 3.3194 | 0.0767   | -108.48 to 2.17    |
| S1 vs S10  | 24.0136         | 1.4996 | 1        | -31.311 to 79.338  |
| S1 vs S11  | 32.0732         | 2.0029 | 1        | -23.251 to 87.398  |
| S2 vs S3   | 9.59449         | 0.5992 | 1        | -45.73 to 64.919   |
| S2 vs S4   | 49.3004         | 3.1868 | 0.1154   | -4.1483 to 102.75  |
| S2 vs S5   | 49.2085         | 3.1809 | 0.1175   | -4.2402 to 102.66  |
| S2 vs S6   | -54.8712        | 3.5469 | 0.0372   | -108.32 to -1.4225 |
| S2 vs S7   | 27.952          | 1.8068 | 1        | -25.497 to 81.401  |
| S2 vs S8   | 49.4112         | 3.194  | 0.1129   | -4.0375 to 102.86  |
| S2 vs S9   | -57.2275        | 3.6992 | 0.0225   | -110.68 to -3.7789 |
| S2 vs S10  | 19.9407         | 1.289  | 1        | -33.508 to 73.389  |
| S2 vs S11  | 28.0004         | 1.81   | 1        | -25.448 to 81.449  |
| S3 vs S4   | 39.7059         | 2.4796 | 0.8469   | -15.619 to 95.03   |
| S3 vs S5   | 39.614          | 2.4738 | 0.8596   | -15.711 to 94.939  |
| S3 vs S6   | -64.4657        | 4.0258 | 0.0074   | -119.79 to -9.1411 |
| S3 vs S7   | 18.3575         | 1.1464 | 1        | -36.967 to 73.682  |
| S3 vs S8   | 39.8167         | 2.4865 | 0.8319   | -15.508 to 95.141  |
| S3 vs S9   | -66.822         | 4.1729 | 0.0044   | -122.15 to -11.497 |
| S3 vs S10  | 10.3462         | 0.6461 | 1        | -44.978 to 65.671  |
| S3 vs S11  | 18.4059         | 1.1494 | 1        | -36.919 to 73.73   |
| S4 vs S5   | -0.0918904      | 0.0059 | 1        | -53.541 to 53.357  |
| S4 vs S6   | -104.172        | 6.7337 | < 0.0001 | -157.62 to -50.723 |
| S4 vs S7   | -21.3483        | 1.38   | 1        | -74.797 to 32.1    |
| S4 vs S8   | 0.110824        | 0.0072 | 1        | -53.338 to 53.559  |
| S4 vs S9   | -106.528        | 6.886  | < 0.0001 | -159.98 to -53.079 |
| S4 vs S10  | -29.3597        | 1.8978 | 1        | -82.808 to 24.089  |
| S4 vs S11  | -21.3           | 1.3768 | 1        | -74.749 to 32.149  |

|            |           |        |          |                    |
|------------|-----------|--------|----------|--------------------|
| S5 vs S6   | -104.08   | 6.7277 | < 0.0001 | -157.53 to -50.631 |
| S5 vs S7   | -21.2564  | 1.374  | 1        | -74.705 to 32.192  |
| S5 vs S8   | 0.202714  | 0.0131 | 1        | -53.246 to 53.651  |
| S5 vs S9   | -106.436  | 6.8801 | < 0.0001 | -159.88 to -52.987 |
| S5 vs S10  | -29.2678  | 1.8919 | 1        | -82.716 to 24.181  |
| S5 vs S11  | -21.2081  | 1.3709 | 1        | -74.657 to 32.241  |
| S6 vs S7   | 82.8232   | 5.3537 | < 0.0001 | 29.375 to 136.27   |
| S6 vs S8   | 104.282   | 6.7408 | < 0.0001 | 50.834 to 157.73   |
| S6 vs S9   | -2.35634  | 0.1523 | 1        | -55.805 to 51.092  |
| S6 vs S10  | 74.8119   | 4.8359 | 0.0004   | 21.363 to 128.26   |
| S6 vs S11  | 82.8715   | 5.3568 | < 0.0001 | 29.423 to 136.32   |
| S7 vs S8   | 21.4592   | 1.3871 | 1        | -31.989 to 74.908  |
| S7 vs S9   | -85.1796  | 5.506  | < 0.0001 | -138.63 to -31.731 |
| S7 vs S10  | -8.01134  | 0.5179 | 1        | -61.46 to 45.437   |
| S7 vs S11  | 0.0483237 | 0.0031 | 1        | -53.4 to 53.497    |
| S8 vs S9   | -106.639  | 6.8932 | < 0.0001 | -160.09 to -53.19  |
| S8 vs S10  | -29.4705  | 1.905  | 1        | -82.919 to 23.978  |
| S8 vs S11  | -21.4108  | 1.384  | 1        | -74.859 to 32.038  |
| S9 vs S10  | 77.1682   | 4.9882 | 0.0002   | 23.72 to 130.62    |
| S9 vs S11  | 85.2279   | 5.5092 | < 0.0001 | 31.779 to 138.68   |
| S10 vs S11 | 8.05967   | 0.521  | 1        | -45.389 to 61.508  |

DF; degrees of freedom

SS; sum of squares

MS; mean square

F; F statistic

P; probability

|t|; t value

CL; confidence limit
