# Supplementary material for: Sulfonium Ligands of the α7 nAChR
Source: MDPI journal article supplement (doi:10.3390/molecules26185643), 2021-09-17
Supplement: s1 [file s1]

**Table S2.** Statistical analysis for data of Figure 4. One Way ANOVA      Figure 4A

Data Table:

Factor A: 11 Groups

S1, S2, S3, S4, S5, S6, S7, S8, S9, S10, S11

Analysis of Variance Results

| Source | DF | SS        | MS          | F        | P        |
|--------|----|-----------|-------------|----------|----------|
| Total  | 84 | 19.395502 | 0.23089883  |          |          |
| A      | 10 | 15.891665 | 1.5891665   | 33.56273 | < 0.0001 |
| Error  | 74 | 3.5038366 | 0.047349144 |          |          |

Bonferroni's All Pairs Comparison

| Comparison | Mean Difference | t       | P        | 95% CL                |
|------------|-----------------|---------|----------|-----------------------|
| S1 vs S2   | 0.633329        | 5.6237  | < 0.0001 | 0.24402 to 1.0226     |
| S1 vs S3   | 1.08606         | 9.9822  | < 0.0001 | 0.70995 to 1.4622     |
| S1 vs S4   | 0.454079        | 4.1735  | 0.0044   | 0.077974 to 0.83018   |
| S1 vs S5   | 0.604589        | 5.3685  | < 0.0001 | 0.21528 to 0.99389    |
| S1 vs S6   | 1.17457         | 10.4297 | < 0.0001 | 0.78526 to 1.5639     |
| S1 vs S7   | 1.11838         | 10.2793 | < 0.0001 | 0.74227 to 1.4945     |
| S1 vs S8   | 1.51958         | 13.9669 | < 0.0001 | 1.1435 to 1.8957      |
| S1 vs S9   | 0.484814        | 4.456   | 0.0016   | 0.10871 to 0.86092    |
| S1 vs S10  | 0.303266        | 2.7874  | 0.3712   | -0.072839 to 0.67937  |
| S1 vs S11  | 0.526359        | 4.8379  | 0.0004   | 0.15025 to 0.90246    |
| S2 vs S3   | 0.452729        | 4.02    | 0.0076   | 0.063424 to 0.84203   |
| S2 vs S4   | -0.17925        | 1.5917  | 1        | -0.56856 to 0.21006   |
| S2 vs S5   | -0.0287402      | 0.2471  | 1        | -0.43081 to 0.37333   |
| S2 vs S6   | 0.54124         | 4.6534  | 0.0008   | 0.13917 to 0.94331    |
| S2 vs S7   | 0.48505         | 4.307   | 0.0028   | 0.095744 to 0.87436   |
| S2 vs S8   | 0.886256        | 7.8696  | < .0001  | 0.49695 to 1.2756     |
| S2 vs S9   | -0.148515       | 1.3188  | 1        | -0.53782 to 0.24079   |
| S2 vs S10  | -0.330063       | 2.9308  | 0.2472   | -0.71937 to 0.059243  |
| S2 vs S11  | -0.10697        | 0.9498  | 1        | -0.49628 to 0.28234   |
| S3 vs S4   | -0.631979       | 5.8087  | < 0.0001 | -1.0081 to -0.25587   |
| S3 vs S5   | -0.48147        | 4.2752  | 0.0031   | -0.87078 to -0.092164 |
| S3 vs S6   | 0.0885109       | 0.7859  | 1        | -0.30079 to 0.47782   |
| S3 vs S7   | 0.0323203       | 0.2971  | 1        | -0.34378 to 0.40843   |
| S3 vs S8   | 0.433526        | 3.9846  | 0.0086   | 0.057421 to 0.80963   |
| S3 vs S9   | -0.601245       | 5.5262  | < 0.0001 | -0.97735 to -0.22514  |
| S3 vs S10  | -0.782792       | 7.1948  | < 0.0001 | -1.1589 to -0.40669   |
| S3 vs S11  | -0.559699       | 5.1443  | 0.0001   | -0.9358 to -0.18359   |
| S4 vs S5   | 0.15051         | 1.3365  | 1        | -0.2388 to 0.53982    |
| S4 vs S6   | 0.72049         | 6.3976  | < 0.0001 | 0.33118 to 1.1098     |
| S4 vs S7   | 0.6643          | 6.1057  | < 0.0001 | 0.28819 to 1.0404     |
| S4 vs S8   | 1.06551         | 9.7933  | < 0.0001 | 0.6894 to 1.4416      |
| S4 vs S9   | 0.0307346       | 0.2825  | 1        | -0.34537 to 0.40684   |
| S4 vs S10  | -0.150813       | 1.3862  | 1        | -0.52692 to 0.22529   |

|            |            |         |          |                      |
|------------|------------|---------|----------|----------------------|
| S4 vs S11  | 0.0722799  | 0.6643  | 1        | -0.30382 to 0.44838  |
| S5 vs S6   | 0.569981   | 4.9005  | 0.0003   | 0.16791 to 0.97205   |
| S5 vs S7   | 0.51379    | 4.5622  | 0.0011   | 0.12448 to 0.9031    |
| S5 vs S8   | 0.914996   | 8.1248  | < 0.0001 | 0.52569 to 1.3043    |
| S5 vs S9   | -0.119775  | 1.0636  | 1        | -0.50908 to 0.26953  |
| S5 vs S10  | -0.301323  | 2.6756  | 0.5048   | -0.69063 to 0.087983 |
| S5 vs S11  | -0.0782297 | 0.6946  | 1        | -0.46754 to 0.31108  |
| S6 vs S7   | -0.0561906 | 0.4989  | 1        | -0.4455 to 0.33311   |
| S6 vs S8   | 0.345015   | 3.0636  | 0.1677   | -0.04429 to 0.73432  |
| S6 vs S9   | -0.689756  | 6.1247  | < 0.0001 | -1.0791 to -0.30045  |
| S6 vs S10  | -0.871303  | 7.7368  | < 0.0001 | -1.2606 to -0.482    |
| S6 vs S11  | -0.64821   | 5.7558  | < 0.0001 | -1.0375 to -0.2589   |
| S7 vs S8   | 0.401206   | 3.6876  | 0.0236   | 0.025101 to 0.77731  |
| S7 vs S9   | -0.633565  | 5.8232  | < 0.0001 | -1.0097 to -0.25746  |
| S7 vs S10  | -0.815113  | 7.4919  | < 0.0001 | -1.1912 to -0.43901  |
| S7 vs S11  | -0.59202   | 5.4414  | < 0.0001 | -0.96812 to -0.21591 |
| S8 vs S9   | -1.03477   | 9.5108  | < 0.0001 | -1.4109 to -0.65867  |
| S8 vs S10  | -1.21632   | 11.1795 | < 0.0001 | -1.5924 to -0.84021  |
| S8 vs S11  | -0.993226  | 9.129   | < 0.0001 | -1.3693 to -0.61712  |
| S9 vs S10  | -0.181548  | 1.6686  | 1        | -0.55765 to 0.19456  |
| S9 vs S11  | 0.0415453  | 0.3819  | 1        | -0.33456 to 0.41765  |
| S10 vs S11 | 0.223093   | 2.0505  | 1        | -0.15301 to 0.5992   |

DF; degrees of freedom

SS; sum of squares

MS; mean square

F; F statistic

P; probability

|t|; t value

CL; confidence limit
