# Supplementary material for: Sulfonium Ligands of the α7 nAChR
Source: MDPI journal article supplement (doi:10.3390/molecules26185643), 2021-09-17
Supplement: s1 [file s1]

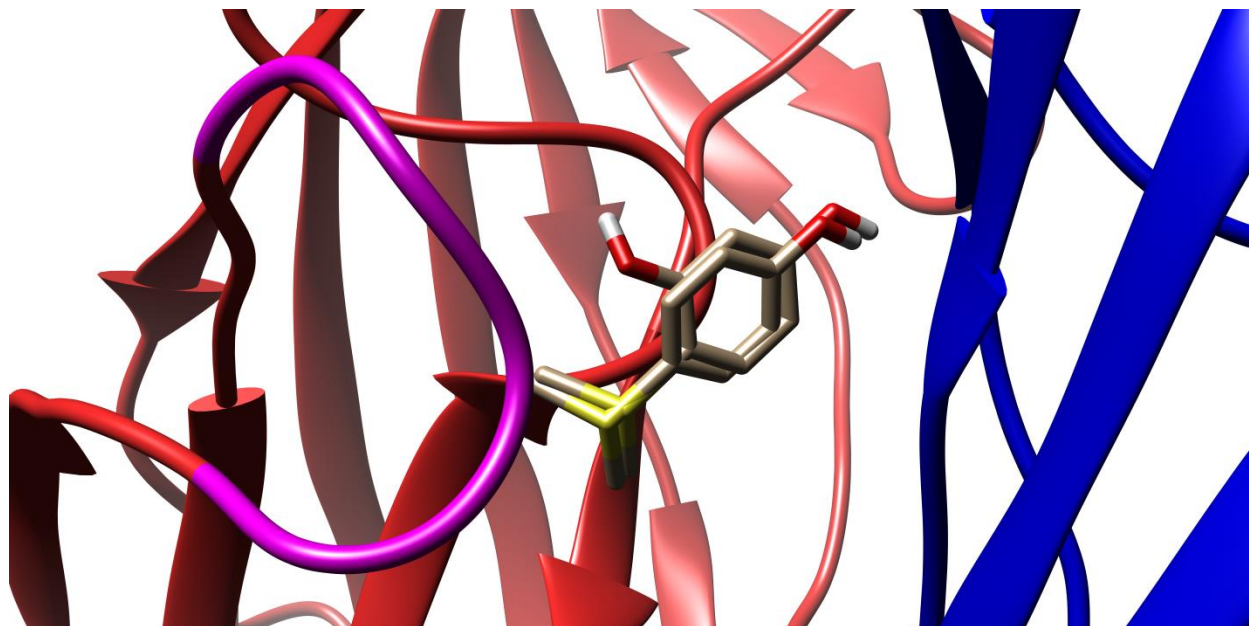

**Figure S1.** Best poses for docking compounds S5 and S9 into  $\alpha 7$ . The red ribbon corresponds to the (+) side of the subunit interface and the blue ribbon corresponds to the (-) side of the subunit interface. The C-loop, covering the orthosteric site is highlighted in magenta.
